# Supplementary material
Source: PubMed Central journal article supplement (PMC7111420)

## Supporting Information:

### **Targeting zoonotic viruses: structure-based inhibition of the 3C-like protease from bat coronavirus HKU4 – the likely reservoir host to the human coronavirus that causes Middle East Respiratory Syndrome.**

Sarah E. St. John,<sup>1,2,3</sup> Sakshi Tomar,<sup>3</sup> Shaun R. Stauffer,<sup>4</sup> and Andrew D. Mesecar<sup>1,2,3\*</sup>

<sup>1</sup>Department of Chemistry, Purdue University, West Lafayette, Indiana, USA

<sup>2</sup>Centers for Cancer Research & Drug Discovery, Purdue University, West Lafayette, Indiana, USA

<sup>3</sup>Department of Biological Sciences, Purdue University, West Lafayette, Indiana, USA

<sup>4</sup>Department of Pharmacology, Department of Chemistry, Vanderbilt University Medical Center, Nashville, Tennessee, USA

\*Corresponding Author's Contact Information:

Andrew D. Mesecar, Ph.D.

Professor, Departments of Biological Sciences and Chemistry

Purdue University

915 West State Street

West Lafayette, Indiana 47907

Ph: 765-494-1924

Email: amesecar@purdue.edu

## Content:

### Supporting Tables:

|                                                          |    |
|----------------------------------------------------------|----|
| S1. Comprehensive Class A Peptidomimetic Library .....   | 2  |
| S2. Comprehensive Class B Peptidomimetic Library .....   | 4  |
| S3. Comparison of Class A and B Inhibitors.....          | 21 |
| S4. X-Ray Data Collection and Refinement Statistics..... | 22 |

### Supporting Spectra:

|                                         |    |
|-----------------------------------------|----|
| <sup>1</sup> H-NMR of <b>22A</b> .....  | 23 |
| <sup>13</sup> C-NMR of <b>22A</b> ..... | 24 |
| ESI-MS(+) of <b>22A</b> .....           | 25 |
| <sup>1</sup> H-NMR of <b>23A</b> .....  | 26 |
| <sup>13</sup> C-NMR of <b>23A</b> ..... | 27 |
| ESI-MS(+) of <b>23A</b> .....           | 28 |
| <sup>1</sup> H-NMR of <b>24A</b> .....  | 29 |
| <sup>13</sup> C-NMR of <b>24A</b> ..... | 30 |
| ESI-MS(+) of <b>24A</b> .....           | 31 |

# S1. Comprehensive Class A Peptidomimetic Library.

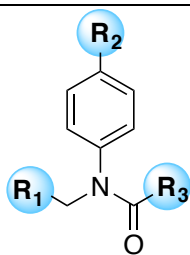

**Peptidomimetic Backbone 1  
(Class A)**

| Cmpd. | R <sub>1</sub> | R <sub>2</sub> | R <sub>3</sub> | % Inhib. at 100 μM | IC <sub>50</sub> (μM) | % Max. Inhibition |
|-------|----------------|----------------|----------------|--------------------|-----------------------|-------------------|
| 1A    |                |                |                | 93%                | 0.33 ± 0.02           | 97.8 ± 0.6        |
| 2A    |                |                |                | 90%                | 0.41 ± 0.04           | 92.1 ± 1.2        |
| 3A    |                |                |                | 94%                | 1.2 ± 0.2             | 92.7 ± 2.2        |
| 4A    |                |                |                | 88%                | 1.2 ± 0.06            | 92.5 ± 0.7        |
| 5A    |                |                |                | 98%                | 1.5 ± 0.1             | 93.9 ± 1.6        |
| 6A    |                |                |                | 92%                | 1.6 ± 0.09            | 97.5 ± 1.0        |
| 7A    |                |                |                | 90%                | 1.7 ± 0.2             | 90.4 ± 1.5        |
| 8A    |                |                |                | 89%                | 1.9 ± 0.09            | 92.7 ± 0.8        |
| 9A    |                |                |                | 83%                | 2.0 ± 0.2             | 84.8 ± 1.7        |
| 10A   |                |                |                | 92%                | 2.2 ± 0.2             | 87.4 ± 1.7        |
| 11A   |                |                |                | 90%                | 2.4 ± 0.3             | 92.6 ± 2.1        |
| 12A   |                |                |                | 75%                | 2.8 ± 0.4             | 69.0 ± 1.7        |
| 13A   |                |                |                | 92%                | 3.1 ± 0.3             | 95.7 ± 1.8        |

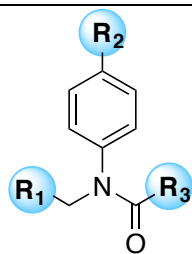

**Peptidomimetic Backbone 1  
(Class A)**

| Cmpd. | R <sub>1</sub> | R <sub>2</sub> | R <sub>3</sub> | % Inhib. at 100 μM | IC <sub>50</sub> (μM) | % Max. Inhibition |
|-------|----------------|----------------|----------------|--------------------|-----------------------|-------------------|
| 14A   |                |                |                | 91%                | 3.1 ± 0.3             | 95.1 ± 1.5        |
| 15A   |                |                |                | 94%                | 3.7 ± 0.4             | 94.5 ± 2.0        |
| 16A   |                |                |                | 91%                | 4.8 ± 0.4             | 93.9 ± 1.7        |
| 17A   |                |                |                | 64%                | 5.3 ± 0.6             | 53.2 ± 1.2        |
| 18A   |                |                |                | 67%                | 8.8 ± 0.8             | 78.0 ± 1.6        |
| 19A   |                |                |                | 63%                | 16.0 ± 4.0            | 83.9 ± 5.5        |
| 20A   |                |                |                | 31%                | n/t                   | n/t               |
| 21A   |                |                |                | 21%                | n/t                   | n/t               |
| 22A   |                |                |                | 49%                | n/t                   | n/t               |
| 23A   |                |                |                | 25%                | n/t                   | n/t               |
| 24A   |                |                |                | 24%                | n/t                   | n/t               |
| 25A   |                |                |                | 15%                | n/t                   | n/t               |

## S2. Comprehensive Class B Peptidomimetic Library.

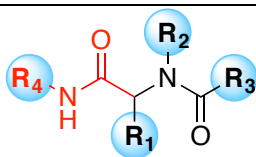

**Peptidomimetic Backbone 2  
(B Class)**

| Cmpd. | R <sub>1</sub> | R <sub>2</sub> | R <sub>3</sub> | R <sub>4</sub> | % Inhib. at 100 μM | IC <sub>50</sub> (μM) | % Max. Inhibition |
|-------|----------------|----------------|----------------|----------------|--------------------|-----------------------|-------------------|
| 1B    |                |                |                |                | 60%                | 1.3 ± 0.3             | 50.4 ± 2.4        |
| 2B    |                |                |                |                | 62%                | 1.5 ± 0.3             | 53.1 ± 1.8        |
| 3B    |                |                |                |                | 53%                | 1.8 ± 0.5             | 36.4 ± 1.7        |
| 4B    |                |                |                |                | 62%                | 2.2 ± 0.6             | 56.6 ± 2.5        |
| 5B    |                |                |                |                | 79%                | 2.2 ± 0.4             | 79.2 ± 2.7        |
| 6B    |                |                |                |                | 85%                | 2.7 ± 0.4             | 82.6 ± 2.2        |
| 7B    |                |                |                |                | 74%                | 3.4 ± 0.4             | 78.1 ± 2.0        |
| 8B    |                |                |                |                | 52%                | 3.9 ± 0.7             | 56.2 ± 2.1        |
| 9B    |                |                |                |                | 79%                | 4.2 ± 0.2             | 91.3 ± 0.8        |
| 10B   |                |                |                |                | 78%                | 6.9 ± 0.7             | 78.2 ± 1.7        |
| 11B   |                |                |                |                | 71%                | 7.0 ± 1.2             | 76.1 ± 2.8        |
| 12B   |                |                |                |                | 96%                | 8.6 ± 0.9             | 107.2 ± 2.5       |

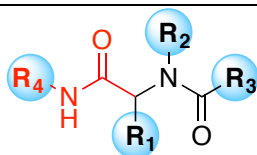

**Peptidomimetic Backbone 2  
(B Class)**

| Cmpd. | R <sub>1</sub> | R <sub>2</sub> | R <sub>3</sub> | R <sub>4</sub> | % Inhib. at 100 μM | IC <sub>50</sub> (μM) | % Max. Inhibition |
|-------|----------------|----------------|----------------|----------------|--------------------|-----------------------|-------------------|
| 13B   |                |                |                |                | 93%                | 9.3 ± 0.5             | 100.9 ± 1.2       |
| 14B   |                |                |                |                | 78%                | 9.5 ± 2.0             | 86.9 ± 4.2        |
| 15B   |                |                |                |                | 94%                | 11.1 ± 0.6            | 100.2 ± 1.3       |
| 16B   |                |                |                |                | 76%                | 14.7 ± 1.1            | 92.1 ± 1.8        |
| 17B   |                |                |                |                | 84%                | 15.4 ± 2.1            | 94.2 ± 3.3        |
| 18B   |                |                |                |                | 76%                | 17.2 ± 2.8            | 89.0 ± 3.9        |
| 19B   |                |                |                |                | 68%                | 18.3 ± 4.7            | 65.4 ± 4.7        |
| 20B   |                |                |                |                | 71%                | 18.7 ± 2.6            | 85.4 ± 3.4        |
| 21B   |                |                |                |                | 64%                | 22.0 ± 7.4            | 53.7 ± 5.5        |
| 22B   |                |                |                |                | 65%                | 35.6 ± 5.2            | 96.5 ± 5.1        |
| 23B   |                |                |                |                | 56%                | 52.3 ± 21.2           | 63.2 ± 10.9       |
| 24B   |                |                |                |                | 58%                | 55.6 ± 14.3           | 58.6 ± 6.6        |



**Peptidomimetic Backbone 2  
(B Class)**

| Cmpd. | R <sub>1</sub> | R <sub>2</sub> | R <sub>3</sub> | R <sub>4</sub> | % Inhib. at 100 μM | IC <sub>50</sub> (μM) | % Max. Inhibition |
|-------|----------------|----------------|----------------|----------------|--------------------|-----------------------|-------------------|
| 25B   |                |                |                |                | 26%                | n/t                   | n/t               |
| 26B   |                |                |                |                | 20%                | n/t                   | n/t               |
| 27B   |                |                |                |                | 21%                | n/t                   | n/t               |
| 28B   |                |                |                |                | 34%                | n/t                   | n/t               |
| 29B   |                |                |                |                | 18%                | n/t                   | n/t               |
| 30B   |                |                |                |                | 53%                | n/t                   | n/t               |
| 31B   |                |                |                |                | 49%                | n/t                   | n/t               |
| 32B   |                |                |                |                | 48%                | n/t                   | n/t               |
| 33B   |                |                |                |                | 47%                | n/t                   | n/t               |
| 34B   |                |                |                |                | 43%                | n/t                   | n/t               |
| 35B   |                |                |                |                | 42%                | n/t                   | n/t               |
| 36B   |                |                |                |                | 41%                | n/t                   | n/t               |



**Peptidomimetic Backbone 2  
(B Class)**

| Cmpd. | R <sub>1</sub> | R <sub>2</sub> | R <sub>3</sub> | R <sub>4</sub> | % Inhib. at 100 μM | IC <sub>50</sub> (μM) | % Max. Inhibition |
|-------|----------------|----------------|----------------|----------------|--------------------|-----------------------|-------------------|
| 37B   |                |                |                |                | 41%                | n/t                   | n/t               |
| 38B   |                |                |                |                | 41%                | n/t                   | n/t               |
| 39B   |                |                |                |                | 41%                | n/t                   | n/t               |
| 40B   |                |                |                |                | 39%                | n/t                   | n/t               |
| 41B   |                |                |                |                | 35%                | n/t                   | n/t               |
| 42B   |                |                |                |                | 36%                | n/t                   | n/t               |
| 43B   |                |                |                |                | 34%                | n/t                   | n/t               |
| 44B   |                |                |                |                | 32%                | n/t                   | n/t               |
| 45B   |                |                |                |                | 31%                | n/t                   | n/t               |
| 46B   |                |                |                |                | 31%                | n/t                   | n/t               |
| 47B   |                |                |                |                | 31%                | n/t                   | n/t               |
| 48B   |                |                |                |                | 30%                | n/t                   | n/t               |



**Peptidomimetic Backbone 2  
(B Class)**

| Cmpd. | R <sub>1</sub> | R <sub>2</sub> | R <sub>3</sub> | R <sub>4</sub> | % Inhib. at 100 μM | IC <sub>50</sub> (μM) | % Max. Inhibition |
|-------|----------------|----------------|----------------|----------------|--------------------|-----------------------|-------------------|
| 49B   |                |                |                |                | 29%                | n/t                   | n/t               |
| 50B   |                |                |                |                | 29%                | n/t                   | n/t               |
| 51B   |                |                |                |                | 29%                | n/t                   | n/t               |
| 52B   |                |                |                |                | 28%                | n/t                   | n/t               |
| 53B   |                |                |                |                | 28%                | n/t                   | n/t               |
| 54B   |                |                |                |                | 28%                | n/t                   | n/t               |
| 55B   |                |                |                |                | 28%                | n/t                   | n/t               |
| 56B   |                |                |                |                | 28%                | n/t                   | n/t               |
| 57B   |                |                |                |                | 27%                | n/t                   | n/t               |
| 58B   |                |                |                |                | 27%                | n/t                   | n/t               |
| 59B   |                |                |                |                | 27%                | n/t                   | n/t               |
| 60B   |                |                |                |                | 26%                | n/t                   | n/t               |





**Peptidomimetic Backbone 2  
(B Class)**

| Cmpd. | R <sub>1</sub> | R <sub>2</sub> | R <sub>3</sub> | R <sub>4</sub> | % Inhib. at 100 μM | IC <sub>50</sub> (μM) | % Max. Inhibition |
|-------|----------------|----------------|----------------|----------------|--------------------|-----------------------|-------------------|
| 61B   |                |                |                |                | 26%                | n/t                   | n/t               |
| 62B   |                |                |                |                | 26%                | n/t                   | n/t               |
| 63B   |                |                |                |                | 26%                | n/t                   | n/t               |
| 64B   |                |                |                |                | 25%                | n/t                   | n/t               |
| 65B   |                |                |                |                | 25%                | n/t                   | n/t               |
| 66B   |                |                |                |                | 25%                | n/t                   | n/t               |
| 67B   |                |                |                |                | 25%                | n/t                   | n/t               |
| 68B   |                |                |                |                | 25%                | n/t                   | n/t               |
| 69B   |                |                |                |                | 24%                | n/t                   | n/t               |
| 70B   |                |                |                |                | 24%                | n/t                   | n/t               |
| 71B   |                |                |                |                | 24%                | n/t                   | n/t               |
| 72B   |                |                |                |                | 24%                | n/t                   | n/t               |



**Peptidomimetic Backbone 2  
(B Class)**

| Cmpd. | R <sub>1</sub> | R <sub>2</sub> | R <sub>3</sub> | R <sub>4</sub> | % Inhib. at 100 μM | IC <sub>50</sub> (μM) | % Max. Inhibition |
|-------|----------------|----------------|----------------|----------------|--------------------|-----------------------|-------------------|
| 73B   |                |                |                |                | 23%                | n/t                   | n/t               |
| 74B   |                |                |                |                | 23%                | n/t                   | n/t               |
| 75B   |                |                |                |                | 23%                | n/t                   | n/t               |
| 76B   |                |                |                |                | 23%                | n/t                   | n/t               |
| 77B   |                |                |                |                | 23%                | n/t                   | n/t               |
| 78B   |                |                |                |                | 23%                | n/t                   | n/t               |
| 79B   |                |                |                |                | 22%                | n/t                   | n/t               |
| 80B   |                |                |                |                | 22%                | n/t                   | n/t               |
| 81B   |                |                |                |                | 22%                | n/t                   | n/t               |
| 82B   |                |                |                |                | 22%                | n/t                   | n/t               |
| 83B   |                |                |                |                | 22%                | n/t                   | n/t               |
| 84B   |                |                |                |                | 22%                | n/t                   | n/t               |



**Peptidomimetic Backbone 2  
(B Class)**

| Cmpd. | R <sub>1</sub> | R <sub>2</sub> | R <sub>3</sub> | R <sub>4</sub> | % Inhib. at 100 μM | IC <sub>50</sub> (μM) | % Max. Inhibition |
|-------|----------------|----------------|----------------|----------------|--------------------|-----------------------|-------------------|
| 85B   |                |                |                |                | 21%                | n/t                   | n/t               |
| 86B   |                |                |                |                | 21%                | n/t                   | n/t               |
| 87B   |                |                |                |                | 21%                | n/t                   | n/t               |
| 88B   |                |                |                |                | 21%                | n/t                   | n/t               |
| 89B   |                |                |                |                | 21%                | n/t                   | n/t               |
| 90B   |                |                |                |                | 21%                | n/t                   | n/t               |
| 91B   |                |                |                |                | 21%                | n/t                   | n/t               |
| 92B   |                |                |                |                | 21%                | n/t                   | n/t               |
| 93B   |                |                |                |                | 21%                | n/t                   | n/t               |
| 94B   |                |                |                |                | 20%                | n/t                   | n/t               |
| 95B   |                |                |                |                | 20%                | n/t                   | n/t               |
| 96B   |                |                |                |                | 20%                | n/t                   | n/t               |



**Peptidomimetic Backbone 2  
(B Class)**

| Cmpd. | R <sub>1</sub> | R <sub>2</sub> | R <sub>3</sub> | R <sub>4</sub> | % Inhib. at 100 μM | IC <sub>50</sub> (μM) | % Max. Inhibition |
|-------|----------------|----------------|----------------|----------------|--------------------|-----------------------|-------------------|
| 97B   |                |                |                |                | 20%                | n/t                   | n/t               |
| 98B   |                |                |                |                | 20%                | n/t                   | n/t               |
| 99B   |                |                |                |                | 20%                | n/t                   | n/t               |
| 100B  |                |                |                |                | 20%                | n/t                   | n/t               |
| 101B  |                |                |                |                | 19%                | n/t                   | n/t               |
| 102B  |                |                |                |                | 19%                | n/t                   | n/t               |
| 103B  |                |                |                |                | 19%                | n/t                   | n/t               |
| 104B  |                |                |                |                | 19%                | n/t                   | n/t               |
| 105B  |                |                |                |                | 19%                | n/t                   | n/t               |
| 106B  |                |                |                |                | 19%                | n/t                   | n/t               |
| 107B  |                |                |                |                | 19%                | n/t                   | n/t               |
| 108B  |                |                |                |                | 19%                | n/t                   | n/t               |



**Peptidomimetic Backbone 2  
(B Class)**

| Cmpd. | R <sub>1</sub> | R <sub>2</sub> | R <sub>3</sub> | R <sub>4</sub> | % Inhib. at 100 μM | IC <sub>50</sub> (μM) | % Max. Inhibition |
|-------|----------------|----------------|----------------|----------------|--------------------|-----------------------|-------------------|
| 109B  |                |                |                |                | 18%                | n/t                   | n/t               |
| 110B  |                |                |                |                | 18%                | n/t                   | n/t               |
| 111B  |                |                |                |                | 18%                | n/t                   | n/t               |
| 112B  |                |                |                |                | 18%                | n/t                   | n/t               |
| 113B  |                |                |                |                | 18%                | n/t                   | n/t               |
| 114B  |                |                |                |                | 18%                | n/t                   | n/t               |
| 115B  |                |                |                |                | 18%                | n/t                   | n/t               |
| 116B  |                |                |                |                | 18%                | n/t                   | n/t               |
| 117B  |                |                |                |                | 18%                | n/t                   | n/t               |
| 118B  |                |                |                |                | 18%                | n/t                   | n/t               |
| 119B  |                |                |                |                | 18%                | n/t                   | n/t               |
| 120B  |                |                |                |                | 18%                | n/t                   | n/t               |



**Peptidomimetic Backbone 2  
(B Class)**

| Cmpd. | R <sub>1</sub> | R <sub>2</sub> | R <sub>3</sub> | R <sub>4</sub> | % Inhib. at 100 μM | IC <sub>50</sub> (μM) | % Max. Inhibition |
|-------|----------------|----------------|----------------|----------------|--------------------|-----------------------|-------------------|
| 121B  |                |                |                |                | 18%                | n/t                   | n/t               |
| 122B  |                |                |                |                | 18%                | n/t                   | n/t               |
| 123B  |                |                |                |                | 17%                | n/t                   | n/t               |
| 124B  |                |                |                |                | 17%                | n/t                   | n/t               |
| 125B  |                |                |                |                | 17%                | n/t                   | n/t               |
| 126B  |                |                |                |                | 17%                | n/t                   | n/t               |
| 127B  |                |                |                |                | 17%                | n/t                   | n/t               |
| 128B  |                |                |                |                | 17%                | n/t                   | n/t               |
| 129B  |                |                |                |                | 17%                | n/t                   | n/t               |
| 130B  |                |                |                |                | 17%                | n/t                   | n/t               |
| 131B  |                |                |                |                | 17%                | n/t                   | n/t               |
| 132B  |                |                |                |                | 17%                | n/t                   | n/t               |

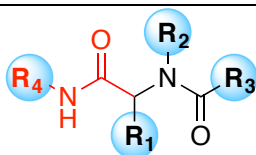

**Peptidomimetic Backbone 2  
(B Class)**

| Cmpd. | R <sub>1</sub> | R <sub>2</sub> | R <sub>3</sub> | R <sub>4</sub> | % Inhib. at 100 μM | IC <sub>50</sub> (μM) | % Max. Inhibition |
|-------|----------------|----------------|----------------|----------------|--------------------|-----------------------|-------------------|
| 133B  |                |                |                |                | 17%                | n/t                   | n/t               |
| 134B  |                |                |                |                | 16%                | n/t                   | n/t               |
| 135B  |                |                |                |                | 16%                | n/t                   | n/t               |
| 136B  |                |                |                |                | 16%                | n/t                   | n/t               |
| 137B  |                |                |                |                | 16%                | n/t                   | n/t               |
| 138B  |                |                |                |                | 16%                | n/t                   | n/t               |
| 139B  |                |                |                |                | 16%                | n/t                   | n/t               |
| 140B  |                |                |                |                | 16%                | n/t                   | n/t               |
| 141B  |                |                |                |                | 16%                | n/t                   | n/t               |
| 142B  |                |                |                |                | 16%                | n/t                   | n/t               |
| 143B  |                |                |                |                | 16%                | n/t                   | n/t               |
| 144B  |                |                |                |                | 16%                | n/t                   | n/t               |



**Peptidomimetic Backbone 2  
(B Class)**

| Cmpd. | R <sub>1</sub> | R <sub>2</sub> | R <sub>3</sub> | R <sub>4</sub> | % Inhib. at 100 μM | IC <sub>50</sub> (μM) | % Max. Inhibition |
|-------|----------------|----------------|----------------|----------------|--------------------|-----------------------|-------------------|
| 145B  |                |                |                |                | 16%                | n/t                   | n/t               |
| 146B  |                |                |                |                | 16%                | n/t                   | n/t               |
| 147B  |                |                |                |                | 16%                | n/t                   | n/t               |
| 148B  |                |                |                |                | 16%                | n/t                   | n/t               |
| 149B  |                |                |                |                | 16%                | n/t                   | n/t               |
| 150B  |                |                |                |                | 15%                | n/t                   | n/t               |
| 151B  |                |                |                |                | 15%                | n/t                   | n/t               |
| 152B  |                |                |                |                | 15%                | n/t                   | n/t               |
| 153B  |                |                |                |                | 15%                | n/t                   | n/t               |
| 154B  |                |                |                |                | 15%                | n/t                   | n/t               |
| 155B  |                |                |                |                | 15%                | n/t                   | n/t               |
| 156B  |                |                |                |                | 15%                | n/t                   | n/t               |





**Peptidomimetic Backbone 2  
(B Class)**

| Cmpd. | R <sub>1</sub> | R <sub>2</sub> | R <sub>3</sub> | R <sub>4</sub> | % Inhib. at 100 μM | IC <sub>50</sub> (μM) | % Max. Inhibition |
|-------|----------------|----------------|----------------|----------------|--------------------|-----------------------|-------------------|
| 157B  |                |                |                |                | 15%                | n/t                   | n/t               |
| 158B  |                |                |                |                | 15%                | n/t                   | n/t               |
| 159B  |                |                |                |                | 15%                | n/t                   | n/t               |
| 160B  |                |                |                |                | 14%                | n/t                   | n/t               |
| 161B  |                |                |                |                | 14%                | n/t                   | n/t               |
| 162B  |                |                |                |                | 14%                | n/t                   | n/t               |
| 163B  |                |                |                |                | 14%                | n/t                   | n/t               |
| 164B  |                |                |                |                | 14%                | n/t                   | n/t               |
| 165B  |                |                |                |                | 14%                | n/t                   | n/t               |
| 166B  |                |                |                |                | 14%                | n/t                   | n/t               |
| 167B  |                |                |                |                | 14%                | n/t                   | n/t               |
| 168B  |                |                |                |                | 14%                | n/t                   | n/t               |



**Peptidomimetic Backbone 2  
(B Class)**

| Cmpd. | R <sub>1</sub> | R <sub>2</sub> | R <sub>3</sub> | R <sub>4</sub> | % Inhib. at 100 μM | IC <sub>50</sub> (μM) | % Max. Inhibition |
|-------|----------------|----------------|----------------|----------------|--------------------|-----------------------|-------------------|
| 169B  |                |                |                |                | 14%                | n/t                   | n/t               |
| 170B  |                |                |                |                | 13%                | n/t                   | n/t               |
| 171B  |                |                |                |                | 13%                | n/t                   | n/t               |
| 172B  |                |                |                |                | 13%                | n/t                   | n/t               |
| 173B  |                |                |                |                | 13%                | n/t                   | n/t               |
| 174B  |                |                |                |                | 13%                | n/t                   | n/t               |
| 175B  |                |                |                |                | 13%                | n/t                   | n/t               |
| 176B  |                |                |                |                | 13%                | n/t                   | n/t               |
| 177B  |                |                |                |                | 13%                | n/t                   | n/t               |
| 178B  |                |                |                |                | 13%                | n/t                   | n/t               |
| 180B  |                |                |                |                | 12%                | n/t                   | n/t               |
| 181B  |                |                |                |                | 12%                | n/t                   | n/t               |



**Peptidomimetic Backbone 2  
(B Class)**

| Cmpd. | R <sub>1</sub> | R <sub>2</sub> | R <sub>3</sub> | R <sub>4</sub> | % Inhib. at 100 μM | IC <sub>50</sub> (μM) | % Max. Inhibition |
|-------|----------------|----------------|----------------|----------------|--------------------|-----------------------|-------------------|
| 182B  |                |                |                |                | 12%                | n/t                   | n/t               |
| 183B  |                |                |                |                | 12%                | n/t                   | n/t               |
| 184B  |                |                |                |                | 12%                | n/t                   | n/t               |
| 185B  |                |                |                |                | 12%                | n/t                   | n/t               |
| 186B  |                |                |                |                | 12%                | n/t                   | n/t               |
| 187B  |                |                |                |                | 12%                | n/t                   | n/t               |
| 188B  |                |                |                |                | 11%                | n/t                   | n/t               |
| 189B  |                |                |                |                | 11%                | n/t                   | n/t               |
| 190B  |                |                |                |                | 11%                | n/t                   | n/t               |
| 191B  |                |                |                |                | 11%                | n/t                   | n/t               |
| 192B  |                |                |                |                | 11%                | n/t                   | n/t               |
| 193B  |                |                |                |                | 11%                | n/t                   | n/t               |



**Peptidomimetic Backbone 2  
(B Class)**

| Cmpd. | R <sub>1</sub> | R <sub>2</sub> | R <sub>3</sub> | R <sub>4</sub> | % Inhib. at 100 μM | IC <sub>50</sub> (μM) | % Max. Inhibition |
|-------|----------------|----------------|----------------|----------------|--------------------|-----------------------|-------------------|
| 194B  |                |                |                |                | 11%                | n/t                   | n/t               |
| 195B  |                |                |                |                | 11%                | n/t                   | n/t               |
| 196B  |                |                |                |                | 11%                | n/t                   | n/t               |
| 197B  |                |                |                |                | 10%                | n/t                   | n/t               |
| 198B  |                |                |                |                | 10%                | n/t                   | n/t               |
| 199B  |                |                |                |                | 10%                | n/t                   | n/t               |
| 200B  |                |                |                |                | 9%                 | n/t                   | n/t               |
| 201B  |                |                |                |                | 9%                 | n/t                   | n/t               |
| 202B  |                |                |                |                | 8%                 | n/t                   | n/t               |
| 203B  |                |                |                |                | 8%                 | n/t                   | n/t               |
| 204B  |                |                |                |                | 8%                 | n/t                   | n/t               |
| 205B  |                |                |                |                | 6%                 | n/t                   | n/t               |

### S3. Comparison of Class A and B Inhibitors.

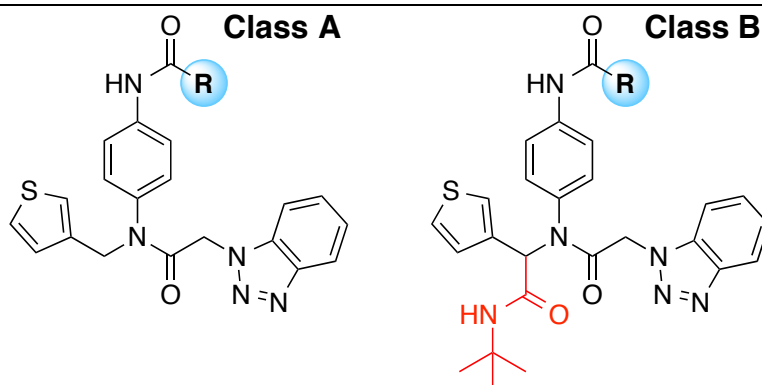

| Class A<br>Cmpd. | Class B<br>Cmpd. | R | Class A<br>% Inhibition<br>at 100 $\mu$ M | Class B<br>% Inhibition<br>at 100 $\mu$ M | Class A<br>$IC_{50}$ ( $\mu$ M) | Class B<br>$IC_{50}$ ( $\mu$ M) |
|------------------|------------------|---|-------------------------------------------|-------------------------------------------|---------------------------------|---------------------------------|
| 1A               | 25B              |   | 93%                                       | 26%                                       | $0.33 \pm 0.02$                 | n/t                             |
| 2A               | 9B               |   | 90%                                       | 79%                                       | $0.41 \pm 0.04$                 | $4.2 \pm 0.9$                   |
| 3A               | 26B              |   | 94%                                       | 20%                                       | $1.2 \pm 0.2$                   | n/t                             |
| 4A               | 27B              |   | 88%                                       | 21%                                       | $1.2 \pm 0.06$                  | n/t                             |
| 6A               | 18B              |   | 92%                                       | 76%                                       | $1.6 \pm 0.09$                  | $17.2 \pm 2.8$                  |
| 8A               | 6B               |   | 89%                                       | 85%                                       | $1.9 \pm 0.09$                  | $2.7 \pm 0.4$                   |
| 13A              | 28B              |   | 92%                                       | 34%                                       | $3.1 \pm 0.3$                   | n/t                             |
| 18A              | 29B              |   | 67%                                       | 18%                                       | $16.0 \pm 4.2$                  | n/t                             |

#### S4. X-Ray Data Collection and Refinement Statistics.

| Data Collection                   | HKU4-CoV<br>3CL <sup>pro</sup> :1A(4YOI)      | HKU4-CoV<br>3CL <sup>pro</sup> :2A(4YOJ)      | HKU4-CoV<br>3CL <sup>pro</sup> :3B(4YOG)      | HKU4-CoV<br>3CL <sup>pro</sup> (4YO9) |
|-----------------------------------|-----------------------------------------------|-----------------------------------------------|-----------------------------------------------|---------------------------------------|
| Space Group                       | P2 <sub>1</sub> 2 <sub>1</sub> 2 <sub>1</sub> | P2 <sub>1</sub> 2 <sub>1</sub> 2 <sub>1</sub> | P2 <sub>1</sub> 2 <sub>1</sub> 2 <sub>1</sub> | P3 <sub>1</sub> 21                    |
| a, b, c (Å)                       | 57.81, 87.99,<br>113.96                       | 57.93, 88.34,<br>112.88                       | 57.80, 87.53,<br>112.99                       | a = b = 80.32,<br>179.54              |
| α, β, γ (°)                       | 90, 90, 90                                    | 90, 90, 90                                    | 90, 90, 90                                    | 90, 90, 120                           |
| Resolution (Å)                    | 1.82                                          | 1.90                                          | 2.00                                          | 2.30                                  |
| Resolution range (Å)              | 29.9-1.82 (1.88-1.82)                         | 26.3-1.90 (1.97-1.90)                         | 28.6-2.00 (2.25-2.00)                         | 26.3-2.30 (2.69-2.30)                 |
| Total reflections collected       | 931,692                                       | 1,439,677                                     | 1,035,166                                     | 1,168,282                             |
| Unique reflections                | 53,467                                        | 46,594                                        | 39,549                                        | 30,634                                |
| $R_{merge}$ (%)                   | 12.0 (72.9)                                   | 11.3 (85.3)                                   | 12.2 (87.4)                                   | 7.9 (97.6)                            |
| $R_{pim}$ (%)                     | 4.6 (29.1)                                    | 4.4 (34.6)                                    | 4.8 (39.4)                                    | 2.4 (28.4)                            |
| $I/\sigma$                        | 31.86 (3.0)                                   | 25.3 (3.5)                                    | 16.5 (1.7)                                    | 43.8 (3.0)                            |
| % Completeness                    | 99.2 (94.1)                                   | 99.9 (100.0)                                  | 97.3 (95.2)                                   | 99.8 (99.9)                           |
| <b>Refinement</b>                 |                                               |                                               |                                               |                                       |
| Reflections in working set        | 52,950                                        | 46,488                                        | 38,445                                        | 30,498                                |
| Reflections in test set           | 2,002                                         | 1,999                                         | 1,999                                         | 2,007                                 |
| $R_{work}$ (%)                    | 17.35                                         | 16.03                                         | 16.97                                         | 19.28                                 |
| $R_{free}$ (%)                    | 20.97                                         | 20.93                                         | 20.99                                         | 25.44                                 |
| Wilson B factor (Å <sup>2</sup> ) | 20.3                                          | 20.7                                          | 25.8                                          | 48.1                                  |

SSJ\_RFL\_backbone\_recrystallized/1

<sup>1</sup>H-NMR (CD<sub>3</sub>OD, 800 MHz)

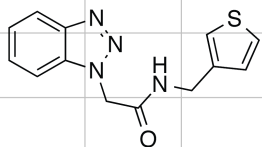

**22A**

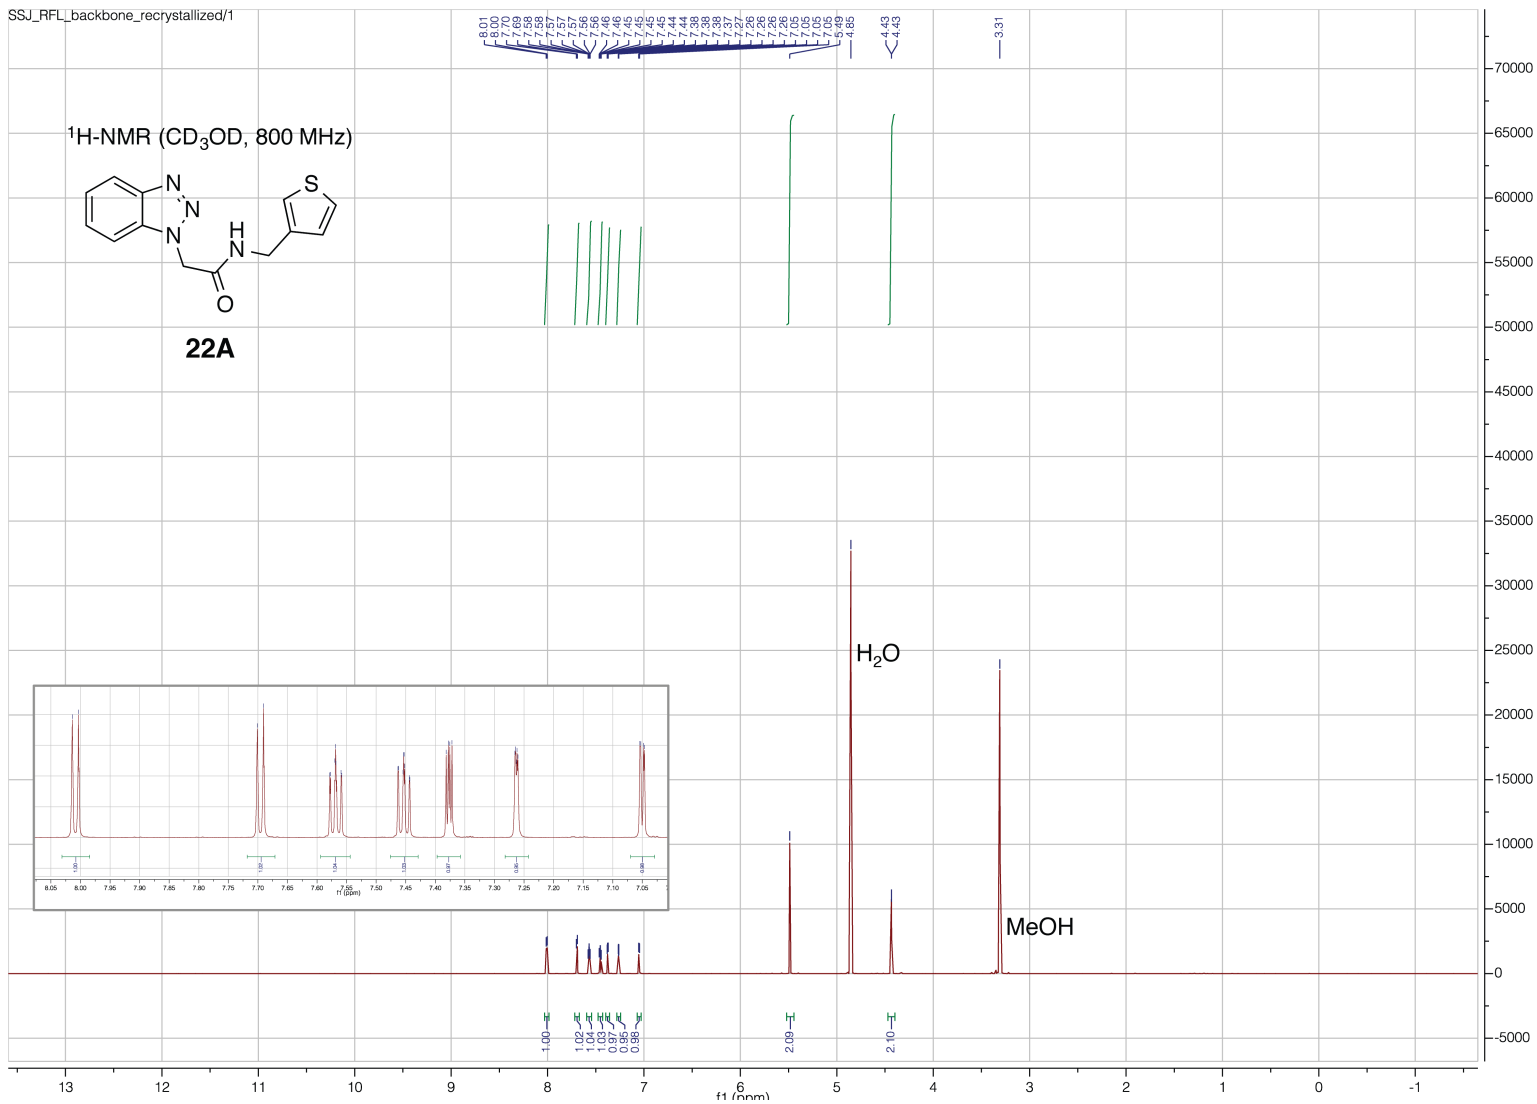

SSJ\_45\_C1F4-8/2

$^{13}\text{C}$ -NMR ( $\text{CD}_3\text{OD}$ , 200 MHz)

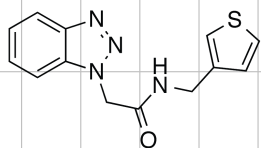

**22A**

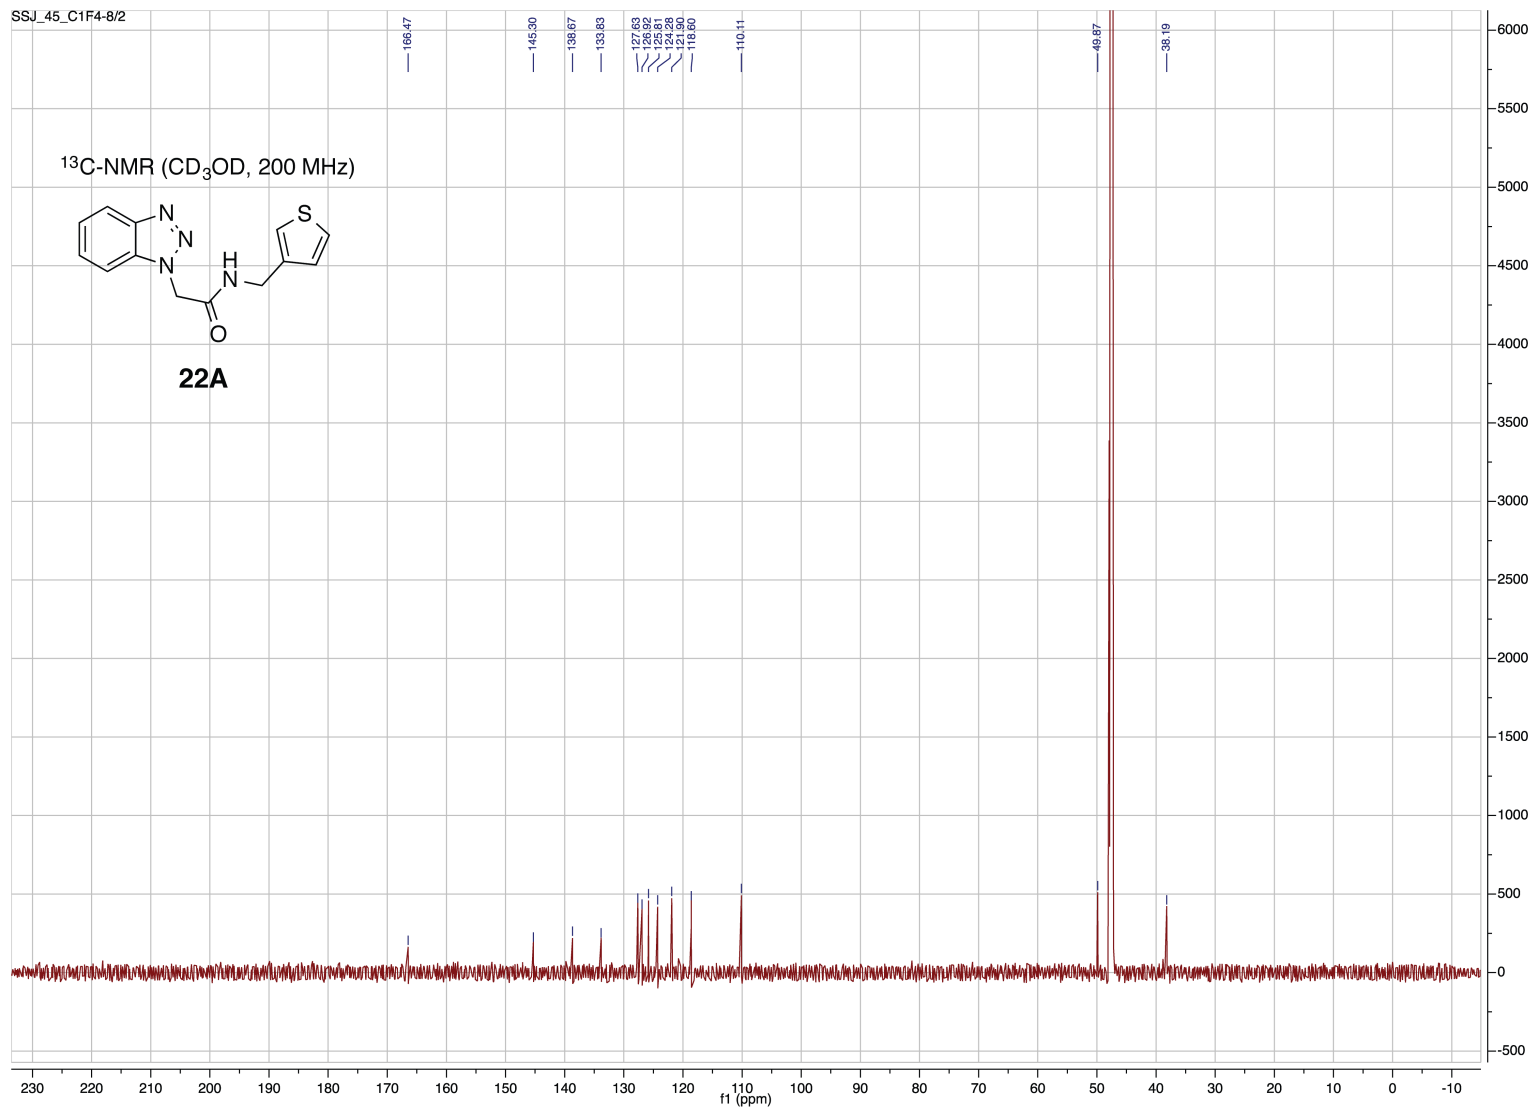



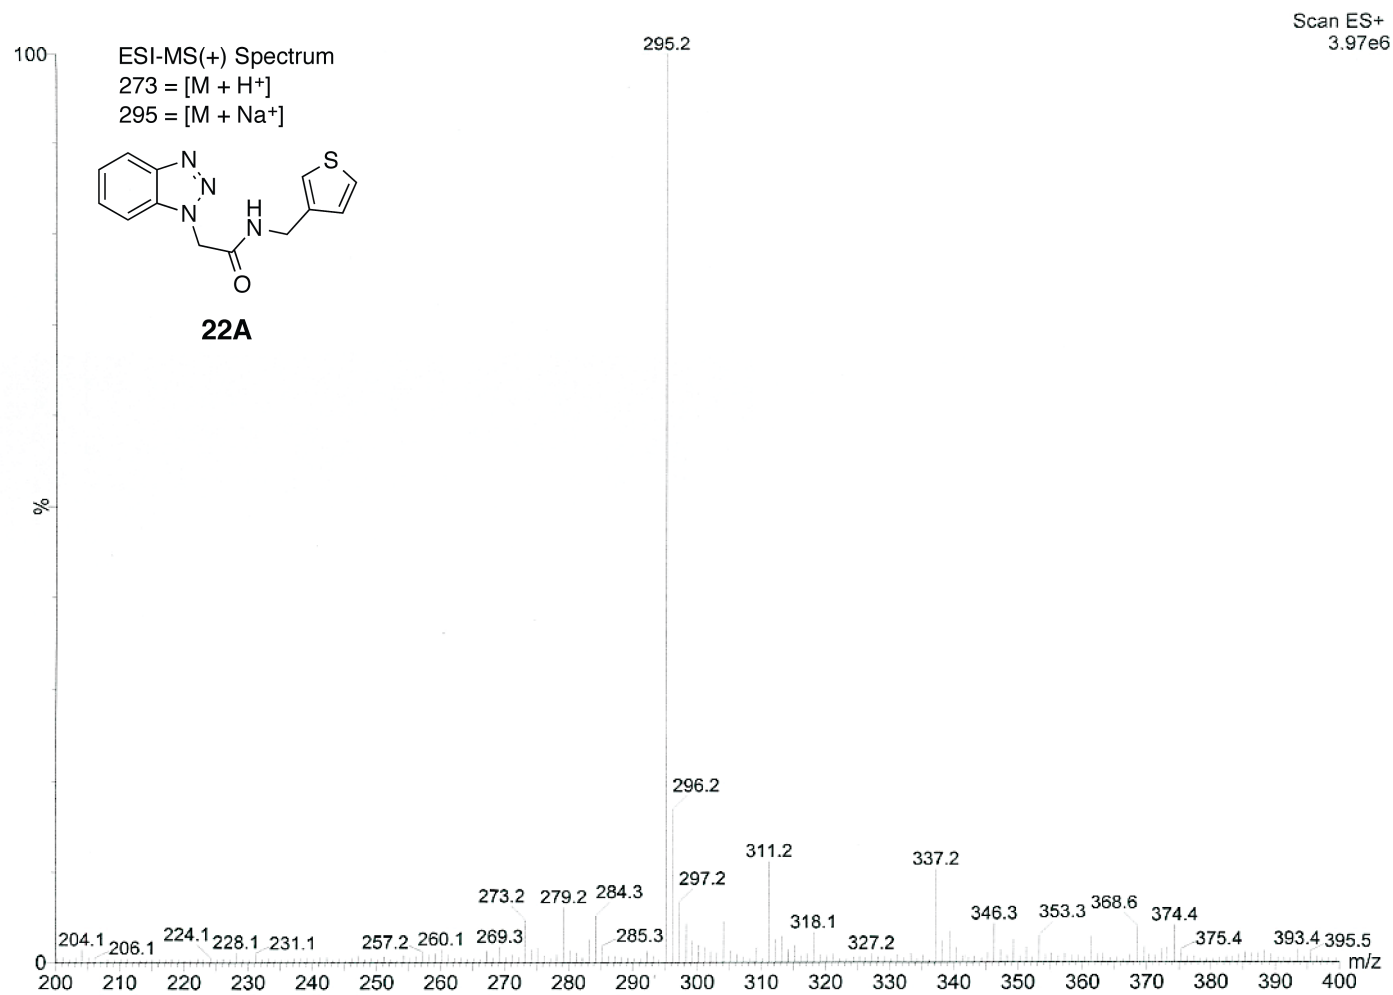

SSJ\_43\_C2F10-24/1

$^1\text{H-NMR}$  ( $\text{CD}_3\text{OD}$ , 800 MHz)

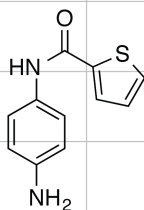

**23A**

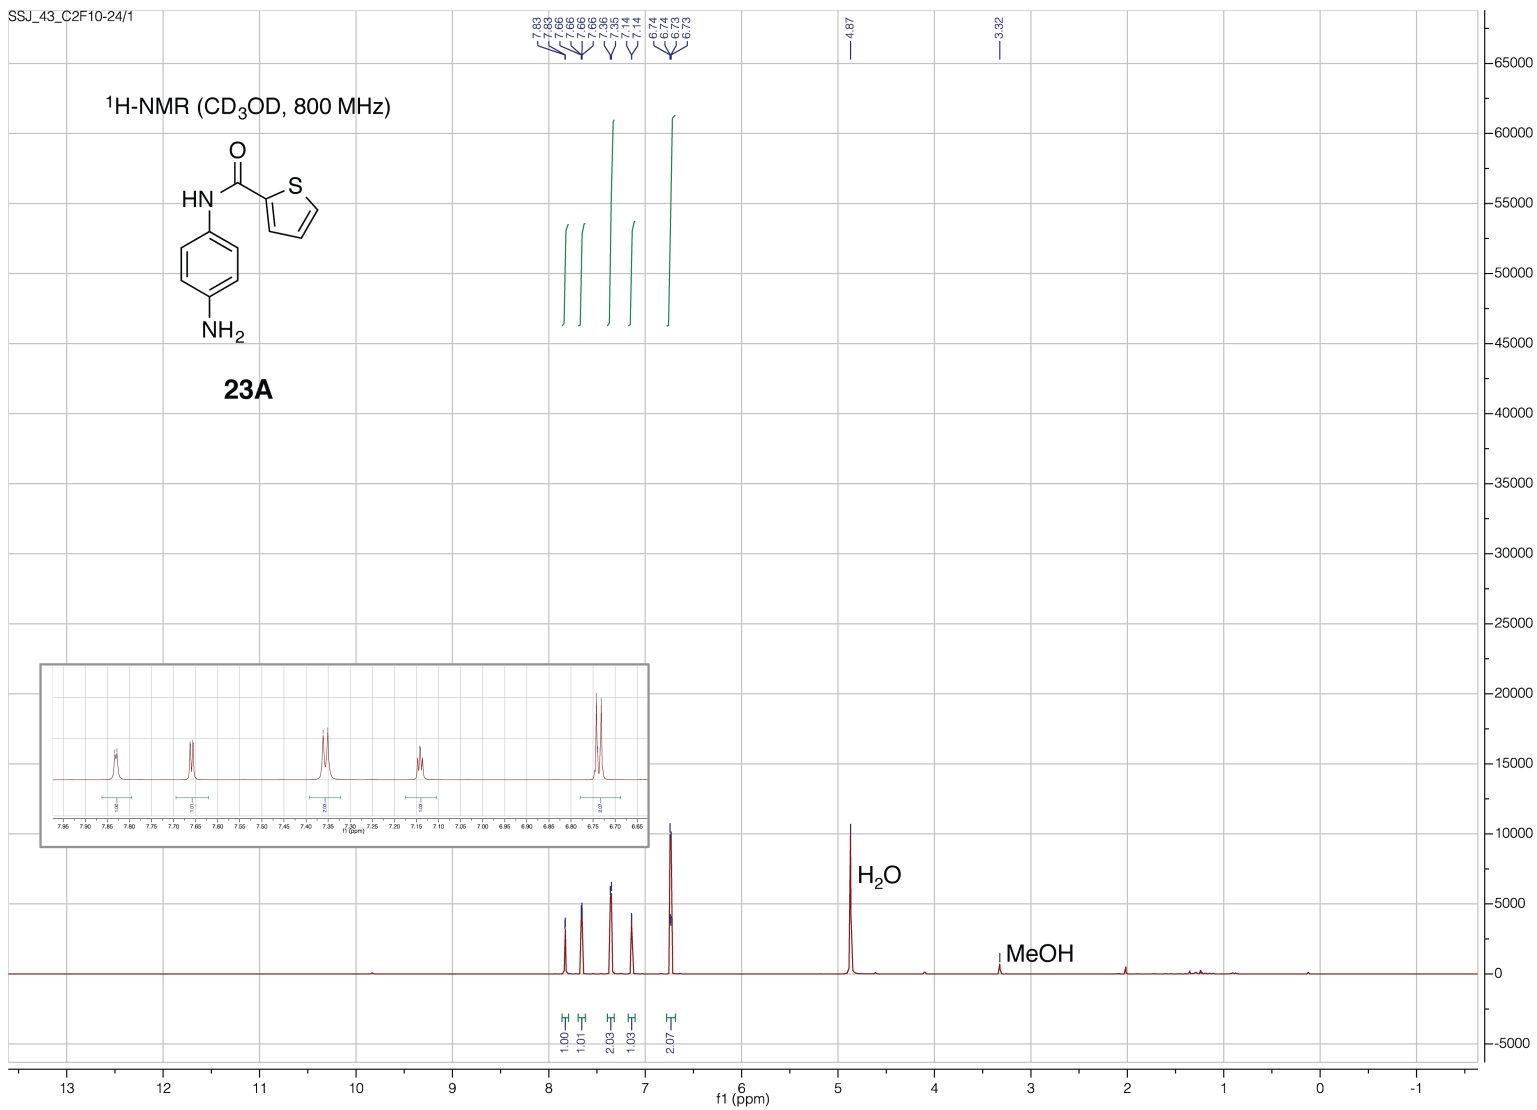

SSJ\_43\_C2F10-24/2

$^{13}\text{C}$ -NMR ( $\text{CD}_3\text{OD}$ , 200 MHz)

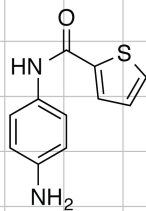

**23A**

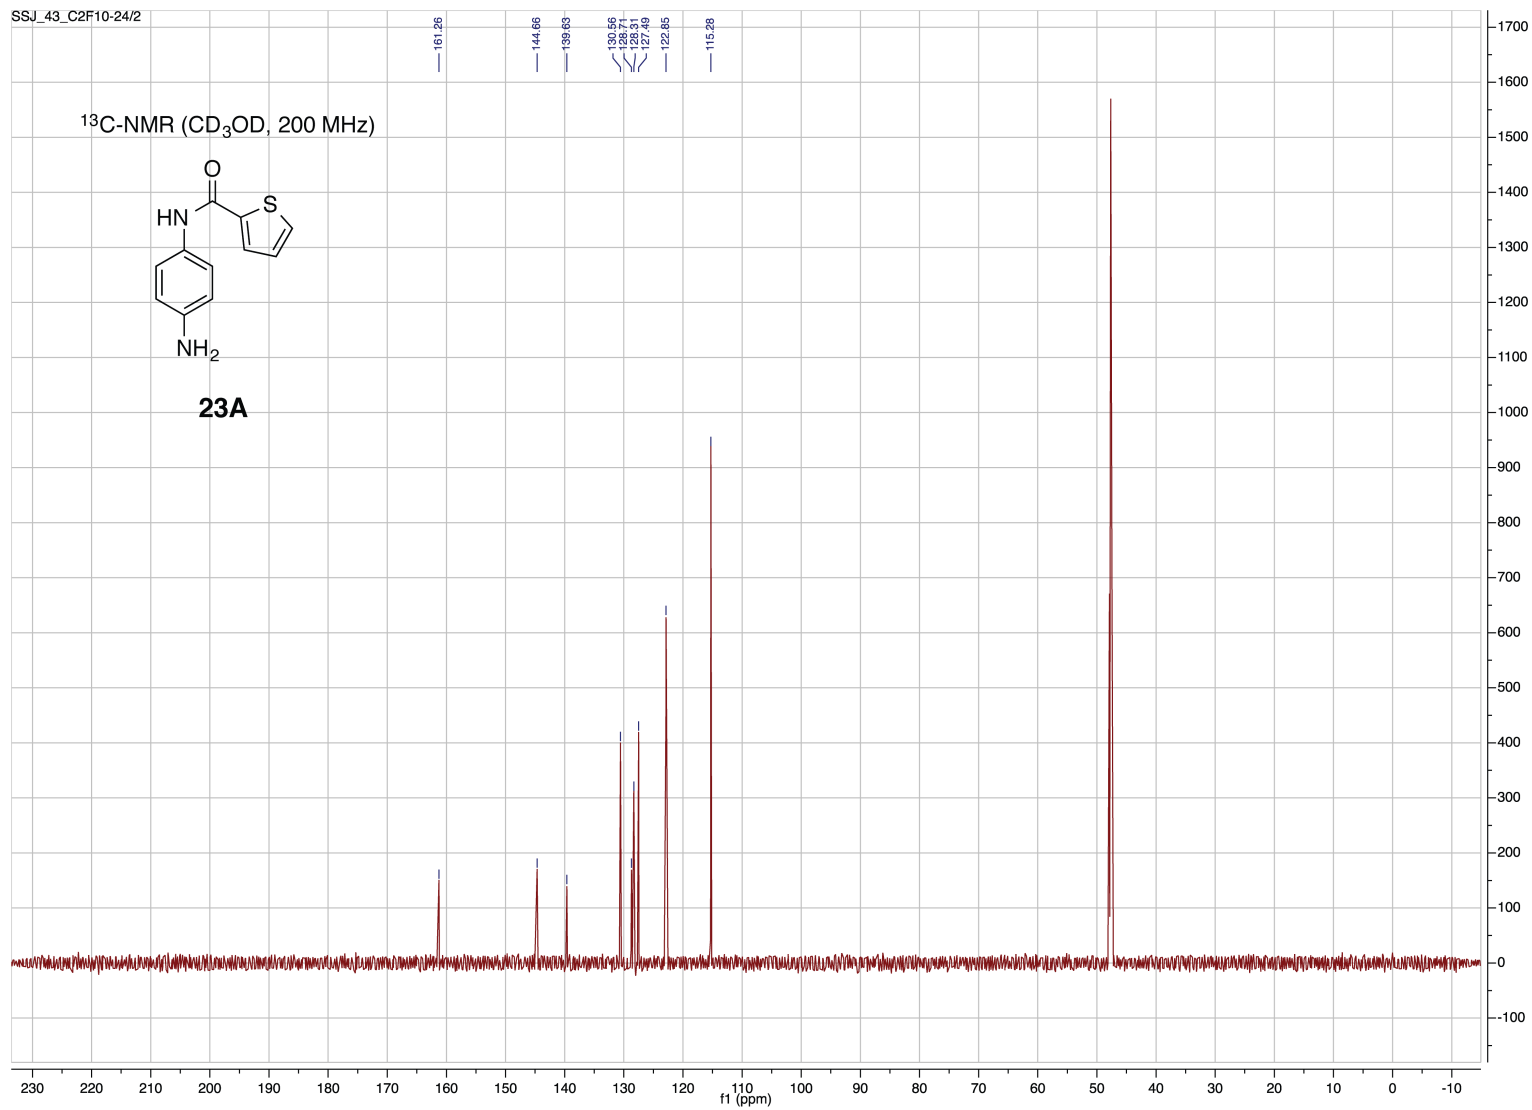

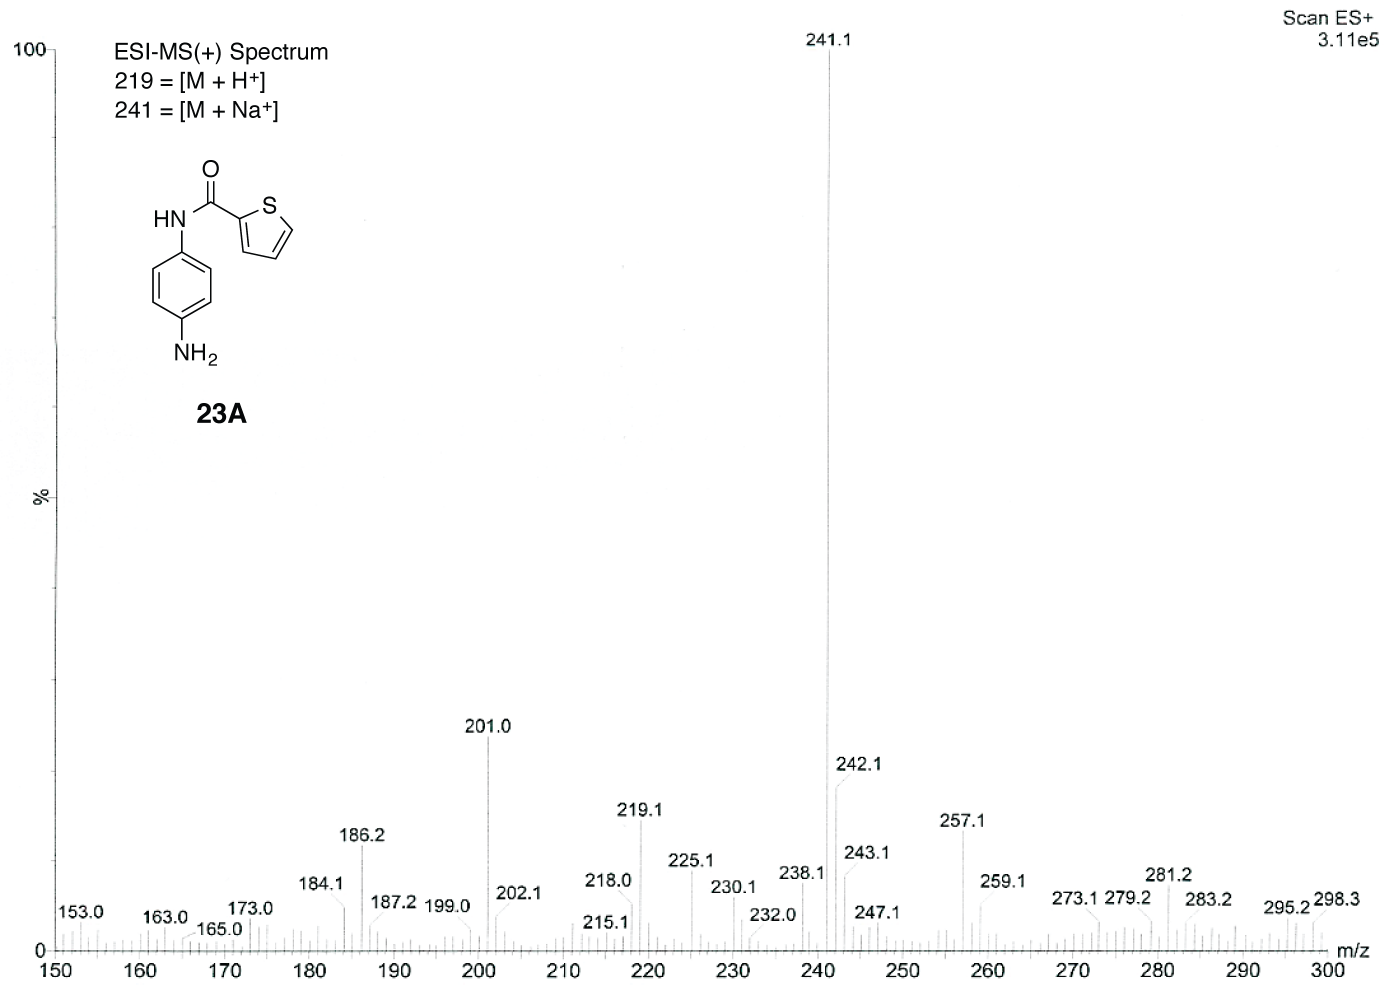

SSJ\_47\_recrystallized/1

<sup>1</sup>H-NMR (CD<sub>3</sub>OD, 800 MHz)

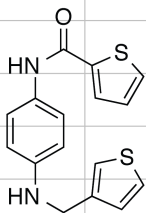

**24A**

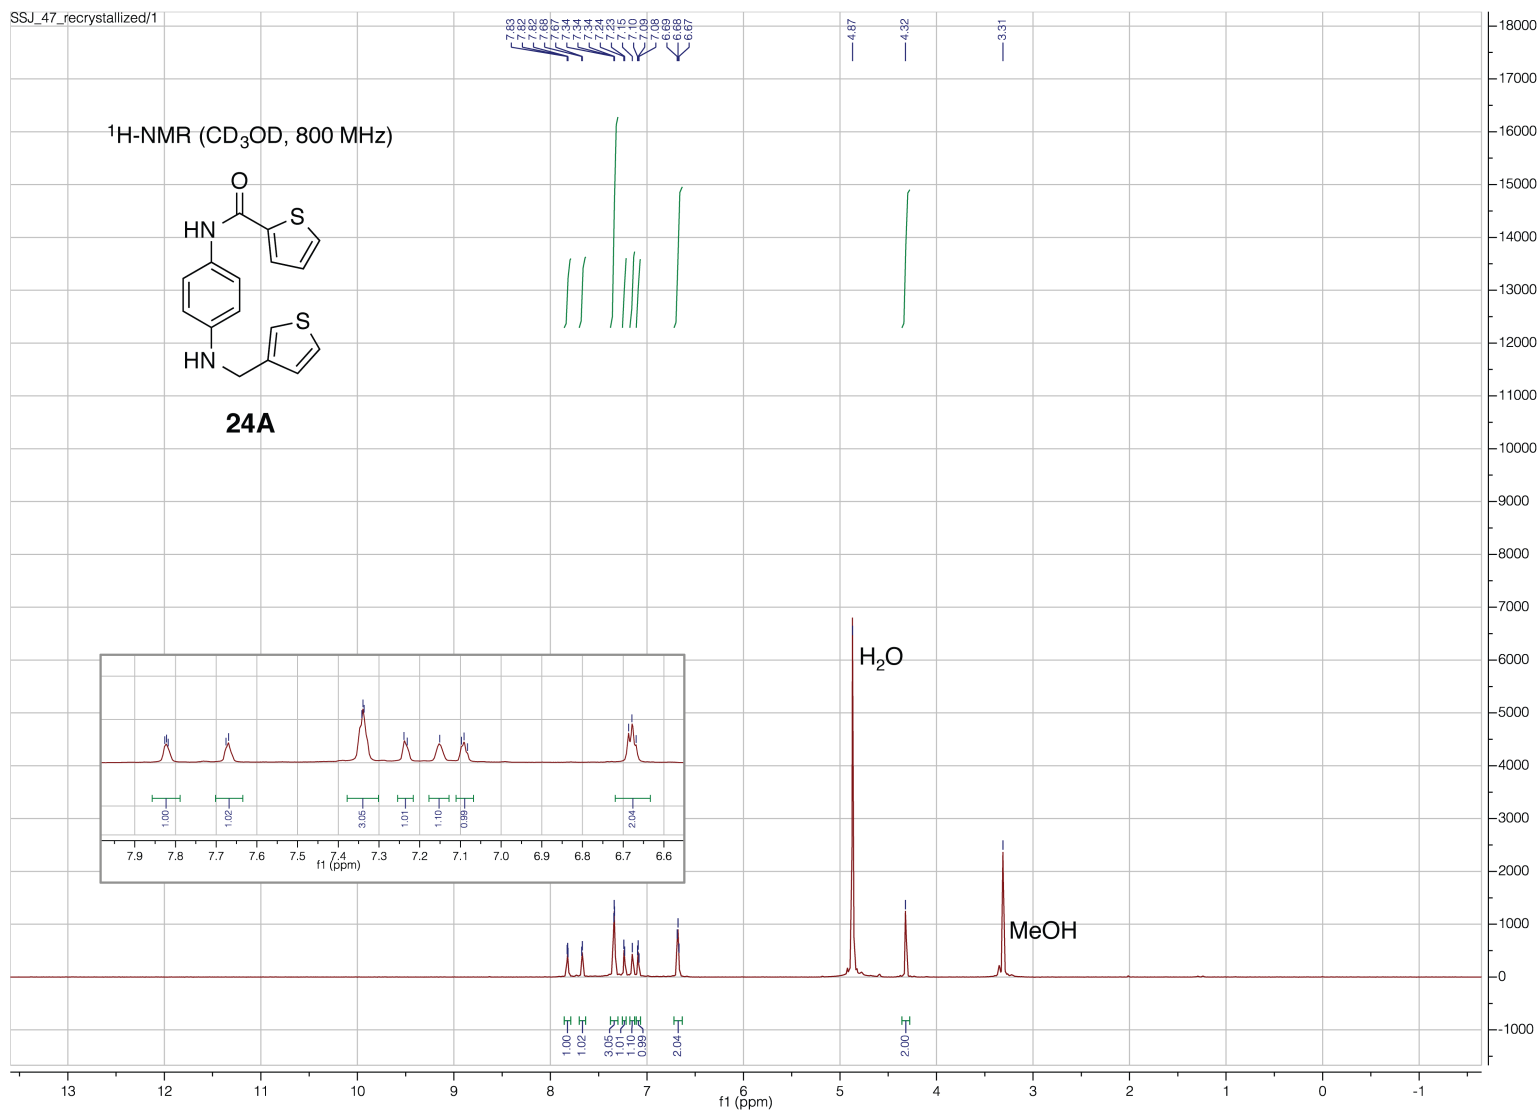

SSJ\_47\_recrystallized/2

$^{13}\text{C}$ -NMR ( $\text{CD}_3\text{OD}$ , 200 MHz)

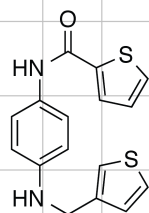

**24A**

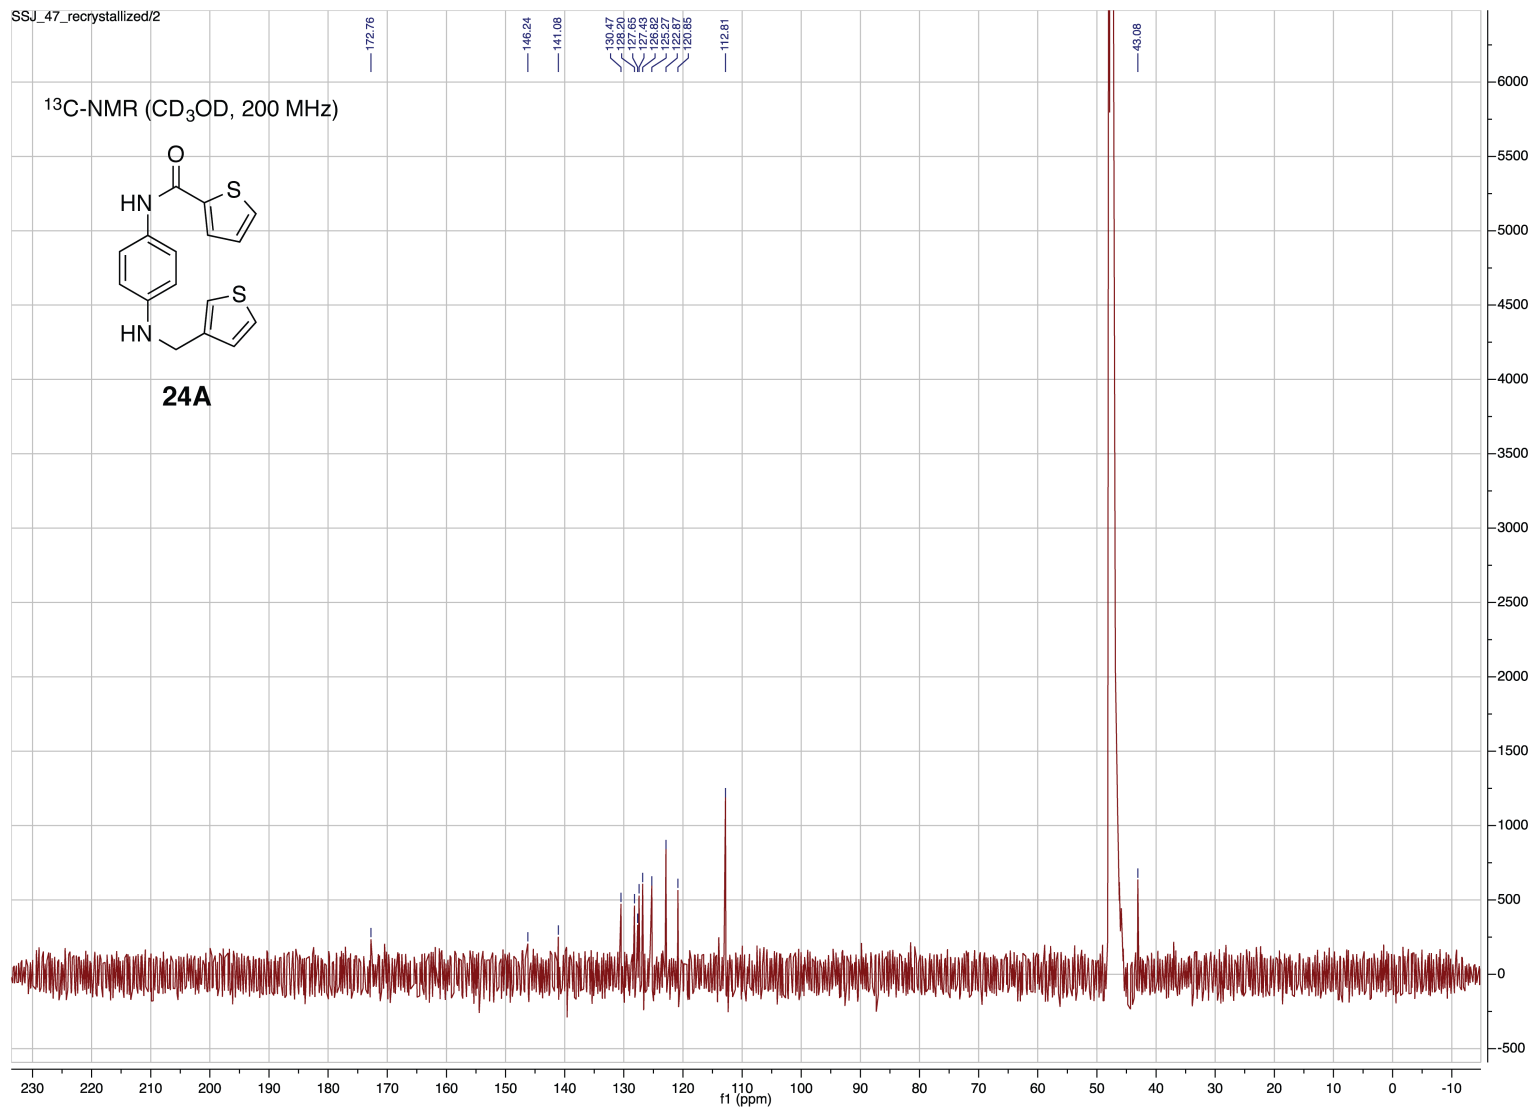

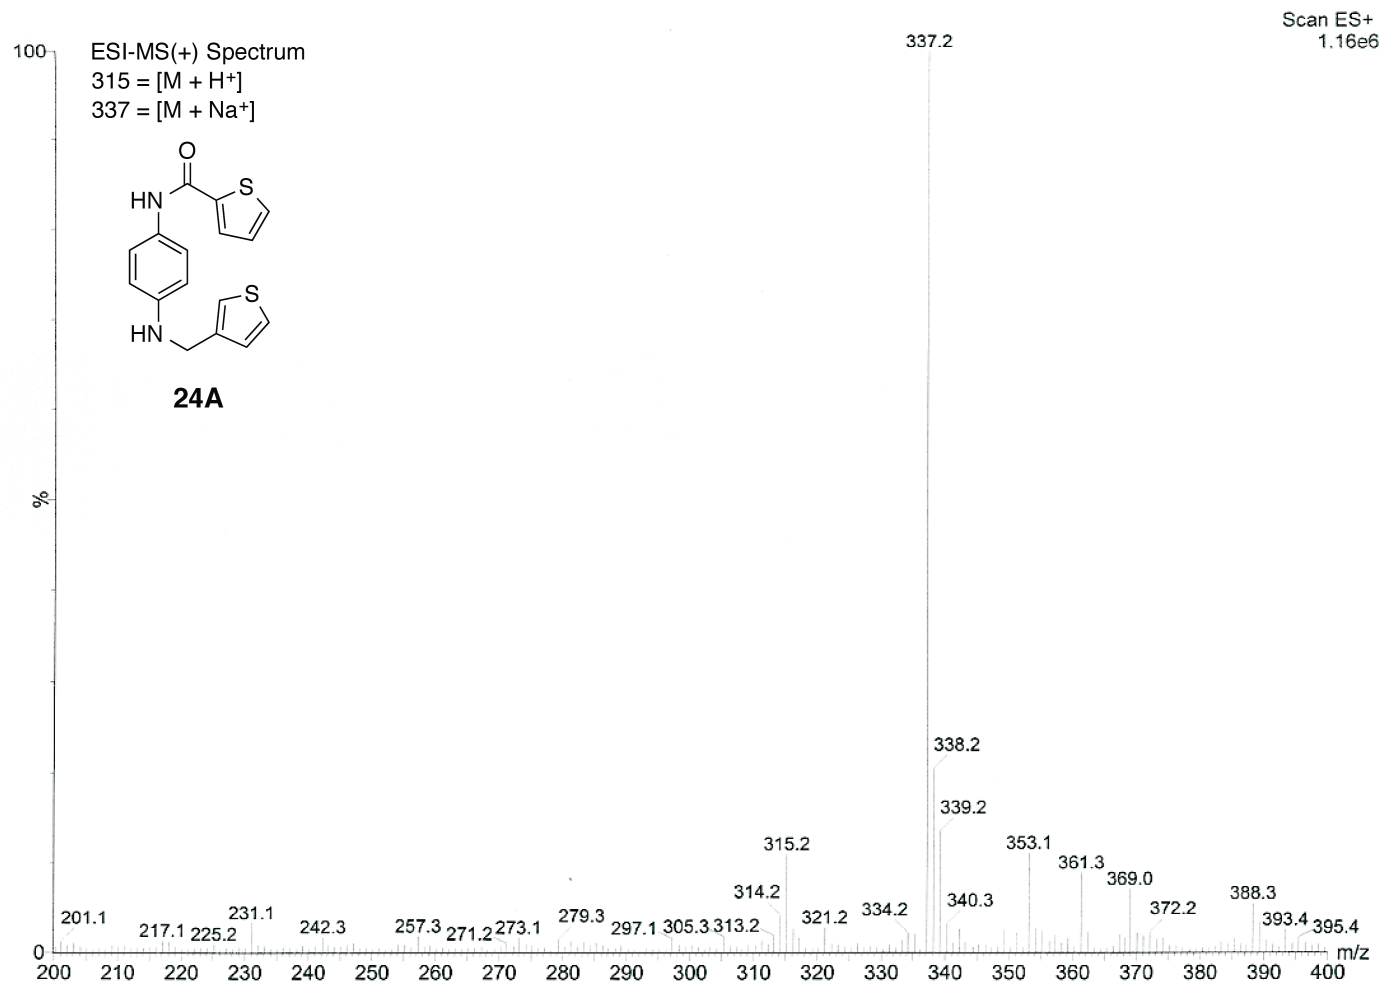

Supplement: mmc1.pdf [file mmc1.pdf]
